# Supplementary material
Source: publisher figshare collection journal article supplement (https://gsapubs.figshare.com/ndownloader/files/22757840)
Supplement: Supplementary file 1 [file 22757840]

*Pre-eruption recharge of the Bishop magma system*

D.A. Wark, W. Hildreth, F.S. Spear, D.J. Cherniak, and E.B. Watson

**DATA REPOSITORY ITEMS**

*Contents:*

- DR1. Summary of Ti analyses of Bishop quartz
- DR2. Calculation of Ti activity
- DR3. Discussion of temperature and melt Ti content
- DR4. Mafic recharge: thermal calculations

**DR1. Summary of Ti analyses of Bishop quartz**

*Table DR1.*

| Sample Number       | Eruption Package | Mean Ti (ppm) in Quartz Cores <sup>b,c</sup> | T, avg (°C) | Mean Ti (ppm) in Quartz Rims <sup>b,c</sup> | T,avg (°C) |
|---------------------|------------------|----------------------------------------------|-------------|---------------------------------------------|------------|
| B-83                | F5               | 47.8 ± 2.6 (8)                               | 721         | 45.3 ± 3.2 (4)                              | 715        |
| B-657               | F6               | 48.5 ± 5.3 (8)                               | 722         | 39.8 ± 0.8 (3)                              | 700        |
| B-94                | Ig1Eb            | 47.9 ± 4.9 (5)                               | 721         | 50.1 ± 1.1 (2)                              | 726        |
| B-80                | Ig1Eb            | 45.0 ± 2.8 (6)                               | 714         | 48.2 ± 3.3 (4)                              | 722        |
| B-413B              | Ig2Ea            | 44.3 ± 3.5 (6)                               | 712         | 46.5 ± 4.7 (4)                              | 718        |
| B-315A              | Ig2Ea            | 45.2 ± 3.9 (19)                              | 715         | 49.3 ± 10.6 (10)                            | 728        |
| B-125               | Ig2Ea            | 48.3 ± 3.2 (4)                               | 722         | 63.0 ± 11.8 (2)                             | 753        |
| B-439A              | Ig2Eb            | 46.0 ± 3.7 (9)                               | 716         | 58.6 ± 7.0 (10)                             | 745        |
| B-397               | Ig2Eb            | 57.2 ± 7.8 (6)                               | 742         | 74.9 ± 6.3 (11)                             | 775        |
| B-394C              | Ig2Eb            | 56.9 ± 3.2 (7)                               | 741         | 87.7 ± 13.2 (6)                             | 795        |
| B-412B              | Ig2Eb            | 54.5 ± 4.7 (12)                              | 736         | 86.5 ± 16.0 (19)                            | 793        |
| B-133               | Ig2Na            | 53.5 ± 4.0 (6)                               | 734         | 76.7 ± 13.0 (2)                             | 778        |
| B-69                | Ig2Nb            | 51.5 ± 4.3 (11)                              | 729         | 75.1 ± 4.4 (6)                              | 775        |
| B-514D <sup>a</sup> | Ig2Nb            | 55.2 ± 4.0 (8)                               | 737         | 93.7 ± 6.8 (3)                              | 804        |
| B-610C              | Ig2NWa           | 54.9 ± 3.1 (8)                               | 737         | 98.2 ± 11.8 (4)                             | 810        |
| B-77                | Ig2NWb           | 56.9 ± 3.5 (5)                               | 741         | 98.2 ± 3.9 (4)                              | 810        |
| B-529A <sup>a</sup> | Ig2NWb           | 50.2 ± 3.2 (6)                               | 726         | 93.7 ± 7.7 (5)                              | 804        |

<sup>a</sup> B-514D and B-529A are dark, “enriched” pumices

<sup>b</sup> Reported analyses determined by ion microprobe except for B-413B and all Ig2Eb samples; Sample B-315A was analyzed by both ion and electron microprobes.

<sup>c</sup> Also shown are standard deviation and number of analyses (in parentheses).

*Figure DR1.*

Plot of individual Ti analyses and TitaniQ temperatures for Bishop quartz.

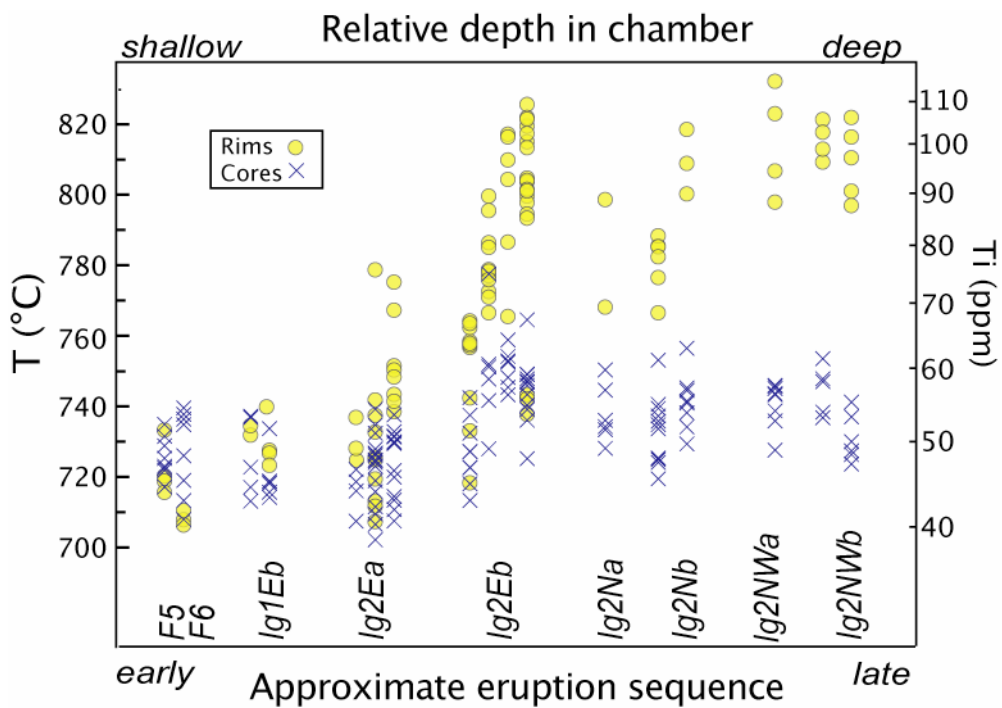

## DR 2. Calculation of TiO<sub>2</sub> activity from ilmenite + magnetite assemblages

Equilibrium between ilmenite and magnetite can be used to define the activity of TiO<sub>2</sub> through the relationship

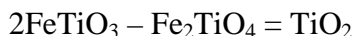

And

$$K = \frac{a_{\text{TiO}_2}}{\left(a_{\text{FeTiO}_3}^{\text{Ilm}}\right)^2 a_{\text{Fe}_2\text{TiO}_4}^{\text{Mag}}}$$

Choosing as a standard state the pure phases ilmenite, ulvöspinel, and rutile at the temperature and pressure of interest, the value of the equilibrium constant can be calculated from tabulated thermodynamic data and the value of  $a(\text{TiO}_2)$  relative to pure rutile can be calculated from the compositions of coexisting ilmenite and magnetite.

In this study, the thermodynamic data of Holland and Powell (1998) was used at the temperature of the Fe-Ti oxide pair as calculated from the thermometer of Andersen and Lindsley (1988), from new Fe-Ti oxide analyses of Bishop Tuff samples presented in Hildreth and Wilson (in review). Ideal solution models were assumed for both ilmenite and spinel.

## References

- Andersen, D.J. and Lindsley, D.H. (1998) Internally consistent solution models for Fe-Mg-Mn-Ti oxides: Fe-Ti oxides. *American Mineralogist*, 73, 714-726.
- Hildreth, W., and Wilson, C.J.N., (in review) Compositional zoning of the Bishop Tuff: *Journal of Petrology*.
- Holland, T.J.B., and Powell, R. (1998) An internally-consistent thermodynamic dataset for phases of petrological interest. *Journal of Metamorphic Geology*, 16, 309-343.

Table DR2. Calculated  $a(\text{TiO}_2)$  values

| Sample | X <sub>Ilm</sub> | X <sub>Usp</sub> | T °C | $a(\text{TiO}_2)$ |
|--------|------------------|------------------|------|-------------------|
| 525A   | 0.863            | 0.262            | 702  | 0.58              |
| 525A   | 0.840            | 0.263            | 748  | 0.63              |
| 522C   | 0.762            | 0.261            | 818  | 0.63              |
| 355B   | 0.841            | 0.238            | 719  | 0.64              |
| 332C   | 0.770            | 0.292            | 834  | 0.60              |
| 383B   | 0.856            | 0.244            | 716  | 0.64              |
| 610c   | 0.775            | 0.251            | 803  | 0.65              |

|       |       |       |      |                 |
|-------|-------|-------|------|-----------------|
| 250   | 0.807 | 0.245 | 756  | 0.63            |
| 275   | 0.824 | 0.242 | 762  | 0.68            |
| 275_2 | 0.808 | 0.249 | 782  | 0.67            |
| 276   | 0.833 | 0.245 | 753  | 0.67            |
| 277_b | 0.784 | 0.255 | 795  | 0.64            |
| 277_A | 0.796 | 0.306 | 816  | 0.58            |
| 279   | 0.831 | 0.253 | 760  | 0.66            |
| 290   | 0.771 | 0.257 | 810  | 0.64            |
| 294   | 0.839 | 0.260 | 725  | 0.60            |
| 315A  | 0.835 | 0.263 | 764  | 0.65            |
| 327   | 0.783 | 0.259 | 802  | 0.64            |
| 353F  | 0.848 | 0.264 | 733  | 0.61            |
| 358_a | 0.851 | 0.253 | 728  | 0.63            |
| 358_b | 0.843 | 0.265 | 749  | 0.63            |
| 364_a | 0.814 | 0.259 | 768  | 0.63            |
| 364_b | 0.833 | 0.258 | 745  | 0.63            |
|       |       |       | Mean | $0.63 \pm 0.03$ |

### DR3. Temperature and melt Ti content.

Here we address a common misconception regarding the relationship between temperature and the Ti content of a rhyolite melt and of the quartz that precipitates from that melt. Readers will recognize that the Ti concentrations reported for Bishop melt and quartz co-vary, in the sense that (a) melt inclusions in quartz, and the quartz itself, both contain higher Ti contents rim-ward, and (b) Ti contents of matrix (groundmass) glass and of the rims of quartz crystals increase with eruption sequence (downward in the magma chamber). A correlation between the Ti content of quartz and the Ti content of the host melt is not surprising, of course, because the Ti content of quartz reflects the Ti content of the melt from which it crystallizes, as described by a partition coefficient. This does not, however, imply that the Ti content of quartz is not dependent on temperature, because at uniform  $\text{TiO}_2$  activity, *the Ti content of the host melt is temperature dependent, too.*

For application of the TitaniQ thermometer (Wark and Watson, 2006),  $\text{TiO}_2$  activity is expressed as the amount of  $\text{TiO}_2$  present relative to the amount of  $\text{TiO}_2$  required for rutile saturation. At high enough  $\text{TiO}_2$  concentration in a melt, the mineral rutile ( $\text{TiO}_2$ ) will precipitate and  $a_{\text{TiO}_2}$  will be one. The concentration of Ti (ppm) in the melt can be calculated from:

$$\log(X_{\text{Ti}}^{\text{melt}}) = (7.95) - \frac{(5305)}{T(K)} + 0.124 \cdot FM$$

which is the rutile solubility equation of Hayden et al. (2005) that is discussed in Wark and Watson (2006). The amount of  $\text{TiO}_2$  in any quartz precipitating from the melt can also be calculated, using equation (6) of Wark and Watson (2006):

$$\log(X_{\text{Ti}}^{\text{qtz}}) = (5.69) - \frac{(3765)}{T(K)}.$$

For this rutile-saturated case, as long as rutile remains a stable phase,  $a_{\text{TiO}_2}$  will remain unchanged (unity), even if temperature varies. However, any temperature increase will result in dissolution of some rutile, thereby increasing the concentrations of  $\text{TiO}_2$  in the melt *and in quartz crystallizing from it*. Any temperature decrease will result in additional crystallization of rutile, thereby lowering the  $\text{TiO}_2$  concentration in the melt, *while also lowering the  $\text{TiO}_2$  concentration in any quartz that precipitates from that melt*. In other words, the concentrations of  $\text{TiO}_2$  in the melt and in the quartz change (as described by the equations above) with changing T, but the activity of  $\text{TiO}_2$  remains fixed.

The same principles apply even if rutile is not present, as long as  $\text{TiO}_2$  activity is relatively well “buffered” by the mineral assemblage. As temperature goes up, more of the Ti-essential phases (such as ilmenite, in the case of the Bishop magma) go into solution. Consequently the  $\text{TiO}_2$  content of both the melt, and of the quartz crystallizing

from the melt, increase. As temperature decreases, more ilmenite will precipitate, lowering the  $\text{TiO}_2$  content of the melt and of newly precipitated quartz. As discussed by Wark and Watson (2006), the  $\text{TiO}_2$  content of each should follow curves like those for the  $a_{\text{TiO}_2}=1$  case, but displaced downward on the plot of  $\log(\text{Ti})$  vs  $1/T$ .

This reasoning explains, then, the observation that the  $\text{TiO}_2$  content of Bishop melt (both matrix melt, and melt trapped as inclusions in feldspar and quartz) is variable, and that it tracks the trends shown by quartz. Since  $\text{TiO}_2$  activity in Bishop magma was relatively well “buffered” by the presence of magnetite and ilmenite over a temperature range of roughly  $100^\circ\text{C}$  (see DR2 above), the variation in Ti content of both melt and of quartz must be attributed to the temperature differences.

**DR4. Mafic recharge: thermal calculations**

Using standard heat balance equations, we estimated that a minimum of 20 – 25 km<sup>3</sup> of mafic melt was required to account for the observed amount of crystal resorption, using the following assumptions:

Volume of magma heated: 15 to 20% of the erupted volume (650 km<sup>3</sup>)

Crystal content of the volume heated: 40%

Amount of phenocryst resorption: 15%

Temperature drop in mafic melt: 200°C

Crystallization of mafic melt during cooling: 40%

Average temperature increase in Bishop magma: 60°C

The following constants were used:

*Mafic recharge melt*

|               |                                         |
|---------------|-----------------------------------------|
| Density       | 2900 Kg m <sup>-3</sup>                 |
| Latent heat   | 4 x 10 <sup>5</sup> J Kg <sup>-1</sup>  |
| Heat capacity | 1484 J Kg <sup>-1</sup> K <sup>-1</sup> |

*Silicic (Bishop) magma*

|               |                                          |
|---------------|------------------------------------------|
| Density       | 2250 Kg m <sup>-3</sup>                  |
| Latent heat   | 2.7 x 10 <sup>5</sup> J Kg <sup>-1</sup> |
| Heat capacity | 1370 J Kg <sup>-1</sup> K <sup>-1</sup>  |
